# Supplementary material for: The association of a reduced susceptibility to moxifloxacin in causative Clostridium (Clostridioides) difficile strain with the clinical outcome of patients
Source: Antimicrob Resist Infect Control. 2020 Jun 30;9:98. doi: 10.1186/s13756-020-00765-y (PMC7325081; doi:10.1186/s13756-020-00765-y)
Supplement: Supplementary file 1 — Additional file 1. [file 13756_2020_765_MOESM1_ESM.xlsx]

## Sheet: List1
TUBE ORDER FORM
Target gene	Forward primer	Reverse primer	Refference	PCR fragment sequence alingment
gyrA	AATGAGTGTTATAGCTGGACG	TCTTTTAACGACTCATCAAAGTT	13 (Dridi et al., 2002)	NC_009089.1_Clostridioides difficile 630

## Sheet: List2
Kategorie	Modifikace	Sequence	Molecular	Abmax	Emmax
		Code	Weight
Attachment	3' Amino Modifier	/3AmM/	179.2
Chemistry/Linkers
	3' Biotin	/3Bio/	437.5
	3' Biotin-TEG	/3BioTEG/	569.6
	3' Cholestery1-TEG	/3CholTEG/	756.0
	3' Digoxigenin NHS Ester	/3DigoxN/	722.9
	3' Thiol Modifier C3 S-S (Disulfide)	/3ThioMC3-D/	244.3
	5' AcryditeTM	/5Acryd/	247.2
	5' Amino Modifier C12	/5AmMC12/	263.3
	5' Amino Modifier C6	/5AmMC6/	179.2
	5' Amino Modifier C6 dT	/5AmMC6T/	458.4
	5' Biotin	/5Biosg/	405.4
	5' Biotin dT	/5BiodT/	684.7
	5' Biotin-TEG	/5BioTEG/	569.6
	5' Digoxigenin NHS Ester	/5DigN/	722.9
	5' Dual Biotin	/52-Bio/	871.0
	5' I-LinkerTM	/5ILink12/	208.2
	5' PCBiotin	/5PCBio/	597.6
	5' Thiol Modifier C6 S-S(Disulfide)	/5ThioMC6-D/	328.4
	5' Uni-LinkTM Amino Modifier	/5UniAmM/	209.2
	Int Amino Modifier C6 dT	/iAmMC6T/	458.4
	Int Biotin dT	/iBiodT/	684.7
	Int Uni-LinkTM Amino Modifier	/3AmM/	179.2
Quenchers	3' Black Hole Quencher® 1	/3BHQ_1/	554.5	534
	3' Black Hole Quencher® 2	/3BHQ_2/	556.5	578
	3' Dabcyl	/3Dab/	757.8	478
	3' Iowa Black FQ®	/3IABlkFQ/	822.7	531
	3' Iowa Black RQ®-Sp	/3IAbRQSp/	678.4	656
	5' Iowa Black FQ®	/5IAbFQ/	426.4	531
	5' Iowa Black RQ®	/5IAbRQ/	420.4	656
Fluorophores	3' 6-FAMTM	/36-FAM/	569.5	495	520
	3' Alexa Fluor® 488 NHS Ester	/3Alexa488N/	695.6	492	517
	3' Alexa Fluor® 532 NHS Ester	/3Alexa532N/	787.8	527	553
	3' Alexa Fluor® 546 NHS Ester	/3Alexa546N/	1121.5	555	571
	3' Alexa Fluor® 594 NHS Ester	/3Alexa594N/	883.9	584	616
	3' Alexa Fluor® 647 NHS Ester	/3Alexa647N/	1020.2	650	670
	3' Alexa Fluor®r 660 NHS Ester	/3Alexa660N/	941.7	661	691
	3' Alexa Fluor® 750 NHS Ester	/3Alexa750N/	1047.2	753	775
	3' Bodipy® 630/650-X NHS Ester	/3Bod650-XN/	724.6	638	653
	3' Cy3TM	/3Cy3Sp/	644.6	550	564
	3' Cy5.5TM	/3Cy55Sp/	770.8	685	706
	3' Cy5TM	/3Cy5Sp/	670.7	648	668
	3' JOE NHS Ester	/3JoeN/	666.42	529	555
	3' MAXTM 557 NHS Ester	/3MAXN/	619.7	524	557
	3' Rhodamine GreenTM-X NHS Ester	/3RhoGn-XN/	648.7	504	531
	3' Rhodamine RedTM-X NHS Ester	/3RhoRd-XN/	833.0	574	594
	3' ROXTM NHS Ester	/3RoxN/	695.8	588	608
	3' TAMRATM NHS Ester	/36-TAMTSp/	591.9	559	583
	3' TAMRATM	/36-TAMSp/	1008.0	559	583
	3' Texas Red®-X NHS Ester	/3TexRed-XN/	881.5	598	617
	5' 6-FAMTM	/56-FAM/	537.6	495	520
	5' Alexa Fluor® 488 NHS Ester	/5Alexa488N/	695.8	492	517
	5' Alexa Fluor® 532 NHS Ester	/5Alexa532N/	787.5	527	553
	5' Alexa Fluor® 546 NHS Ester	/5Alexa546N/	1121.9	555	571
	5' Alexa Fluor® 594 NHS Ester	/5Alexa594N/	883.2	584	616
	5' Alexa Fluor® 647 NHS Ester	/5Alexa647N/	1020.7	650	670
	5' Alexa Fluor®r 660 NHS Ester	/5Alexa660N/	941.2	661	691
	5' Alexa Fluor® 750 NHS Ester	/5Alexa750N/	1047.6	753	775
	5' Bodipy® 630/650-X NHS Ester	/5Bod650-XN/	724.6	638	653
	5' Cy3TM	/5Cy3Sp/	506.6	550	564
	5' Cy5TM	/5Cy5Sp/	532.6	648	668
	5' Cy5.5TM	/5Cy55Sp/	632.7	685	706
	5' Dy 750 NHS Ester	/5Dy750N/	875.1	747	776
	5' Fluorescein dT	/5FluorT/	816.7	495	520
	5' HEXTM	/5HEX/	744.1	538	555
	5' JOE NHS Ester	/56-JOEN/	666.4	529	529
	5' MAXTM NHS Ester	/5MAXN/	619.7	524	557
	5' Rhodamine GreenTM-X NHS Ester	/5RhoG-XN/	648.7	504	531
	5' Rhodamine RedTM-X NHS Ester	/5RhoR-XN/	833.0	574	594
	5' ROXTM NHS Ester	/56-ROXN/	695.8	588	608
	5' TAMRATM NHS Ester	/56-TAMN/	591.6	559	583
	5' TETTM	/5TET/	675.2	522	539
	5' TEXTM 613	/5TEX613-Y/	966.1	598	617
	5' Texas Red®	/5TexRd-XN/	881.0	598	617
	5' TYETM 563	/5TYE563/	490.6	549	563
	5' TYETM 665	/5TYE665/	516.6	647	664
	5' WellRED D2	/5D2/	640.5	763	778
	5' WellRED D3	/5D3/	644.2	683	701
	5' WellRED D4	/5D4/	544.2	648	666
	Int Cy3TM	/iCy3/	506.6	550	564
	Int Cy5TM	/iCy5/	532.6	648	668
	Int Fluorescein dT	/iFluorT/	816.7	495	520
	Int TAMRATM NHS Ester	/i6-TAMN/	870.9	559	583
Modified Bases	3' decxyInosine	/3deoxylI/	314.2
	3' deoxyUridine	/3deoxyU/	290.2
	3' Dideoxy-C	/3ddC/	273.2
	3' Inverted dT	/3InvdT/	304.2
	3' Ribo A	/3RiboA/	329.2
	3' Ribo C	/3RiboC/	305.2
	3' Ribo G	/3RiboG/	345.2
	3' Ribo U	/3RiboU/	306.2
	5' 2, 6-Diaminopurine	/5AmdA/	328.2
	5' 2-Aminopurine	/52AmPr/	313.2
	5' 5-Bromo dU	/55Br-dU/	369.1
	5' 5-Methyl dC	/5Me-dC/	303.2
	5' 5-Nitroindole	/55NitInd/	340.2
	5' deoxyInosine	/5deoxyI/	314.2
	5' deoxyUridine	/5deoxyU/	290.2
	5' isodC	/5Me-isodC/	303.2
	5' isodG	/5isodG/	329.2
	Int 2, 6-Diaminopurine	/i6diPr/	328.2
	Int 2-Aminopurine	/i2AmPr/	313.2
	Int 5-Bromo dU	/i5BR-dU/	369.1
	Int 5-Methyl dC	/iMe-dC/	303.2
	Int 5-Nitroindole	/i5NitInd/	340.2
	Int deoxyInosine	/ideoxyI/	314.2
	Int deoxyUridine	/ideoxyU/	290.2
	Int isodC	/iMe-isodC/	303.2
	Int isodG	/iisodG/	329.2
Phosphorylation	3' Phosphorylation	/3Phos/	79.9
	5' Phosphorylation	/5Phos/	79.9
Spacers	3' C3 Spacer	/3SpC3/	138.1
	5' C3 Spacer	/5SpC3/	138.1
	5' dSpacer	/5dSp/	180.1
	5' PC Spacer	/5SpPC/	344.3
	5' Spacer 18	/5Sp18/	344.3
	5' Spacer 9	/5Sp9/	212.1
	Int C3 Spacer	/iSpC3/	138.1
	Int dSpacer	/idSp/	180.1
	Int PC Spacer	/iSpPC/	344.3
	Int Spacer 18	/iSp18/	344.3
	Int Spacer 9	/iSp9/	212.1
